# Supplementary material for: The next generation of biopanning: next gen sequencing improves analysis of bacterial display libraries
Source: PubMed Central journal article supplement (PMC6925417; doi:10.1186/s12896-019-0577-8), 2019-12-21
Supplement: 12896_2019_577_MOESM1_ESM.pdf [file 12896_2019_577_MOESM1_ESM.pdf]

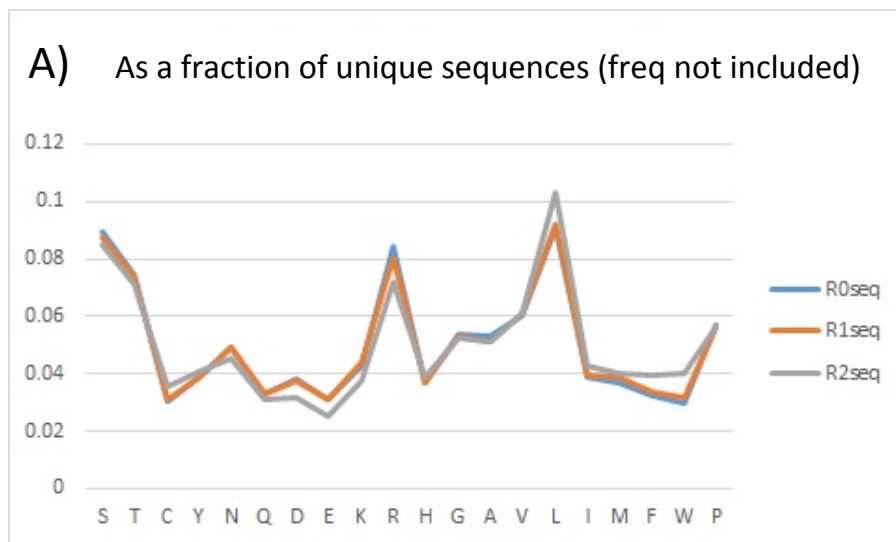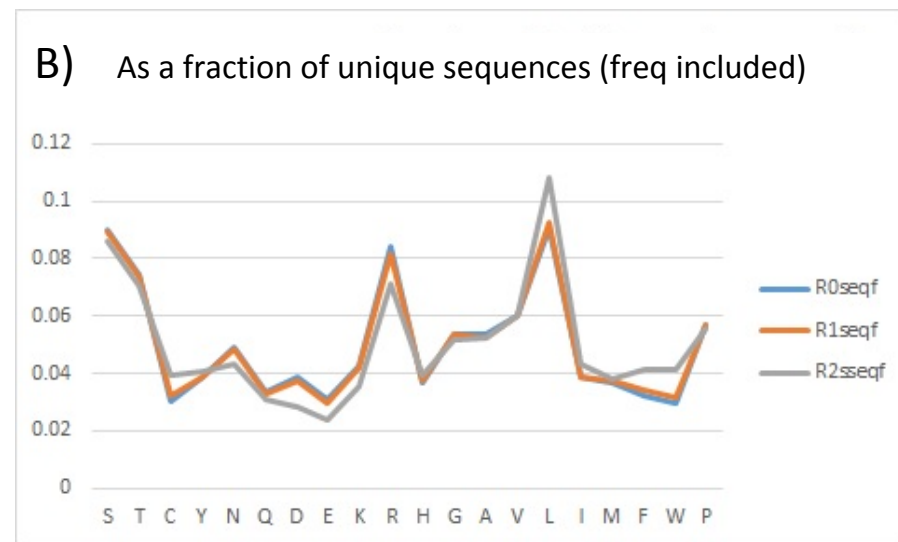

**Supplementary Figure S1. Amino acid representation within all unique sequences within the library excluding (A) and including (B) the effects of frequency of sequence occurrence, for Round 0 (blue), Round 1 (orange) and Round 2 (grey).**

A)

FG - UniqueR0SEQ15mer; BG - E. coli K12 protein

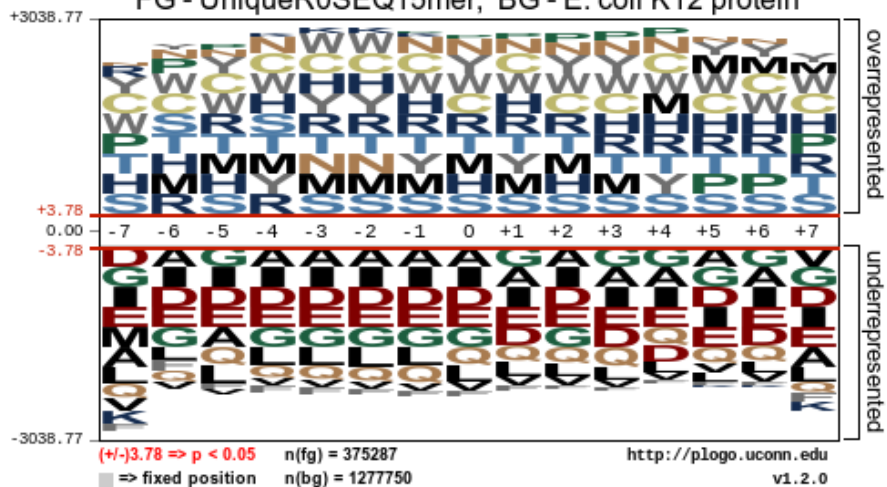

B)

FG - UniqueR1SEQ15mer1; BG - E. coli K12 protein

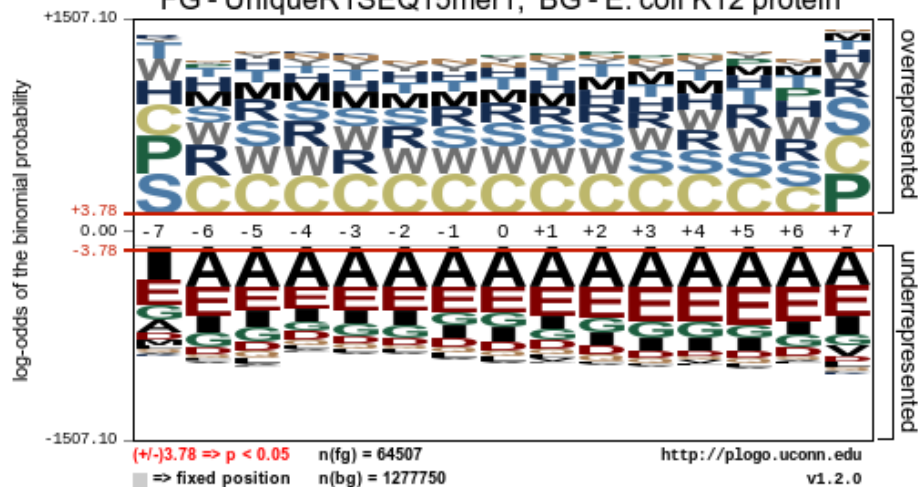

C)

FG - UniquePeptides\_S2\_R2SEQ15; BG - E. coli K12 protein

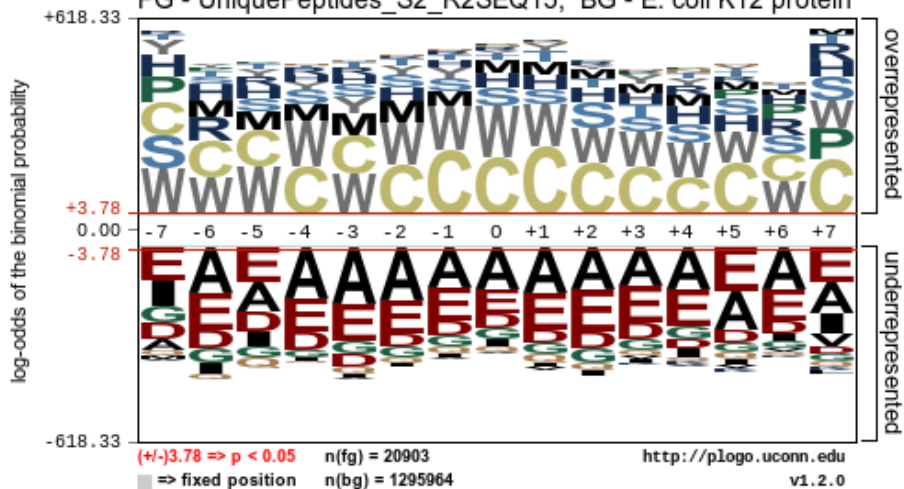

Supplementary Figure S2. Visualization of motifs of unique 15-mer sequences calculated against background probabilities for *E. coli* K12 in (A) Round 0 (B) Round 1 and (C) Round 2 libraries, as generated by the pLogo software (<http://plogo.uconn.edu>) of O'Shea *et al.* [21]

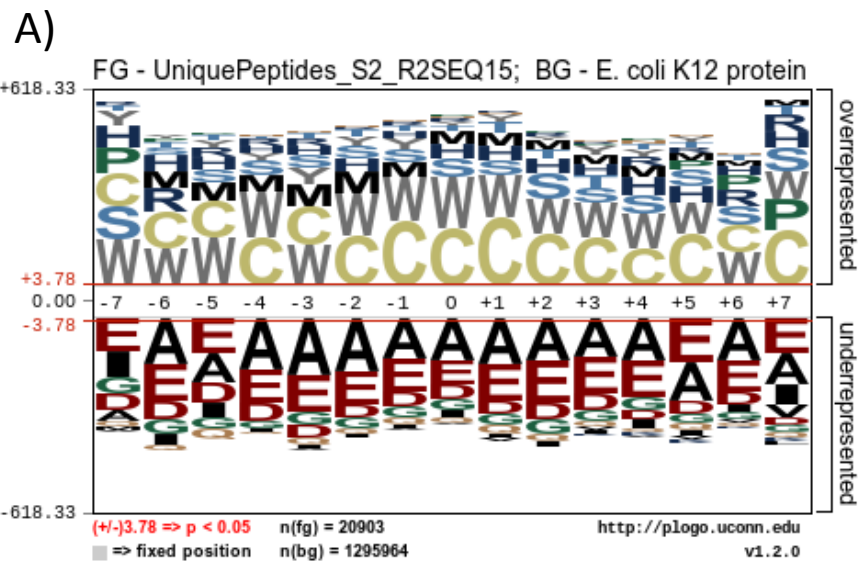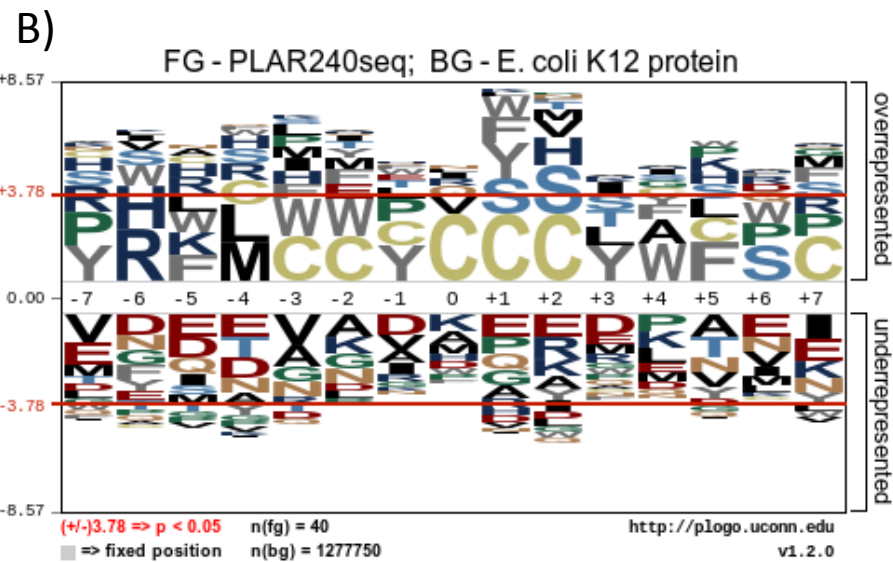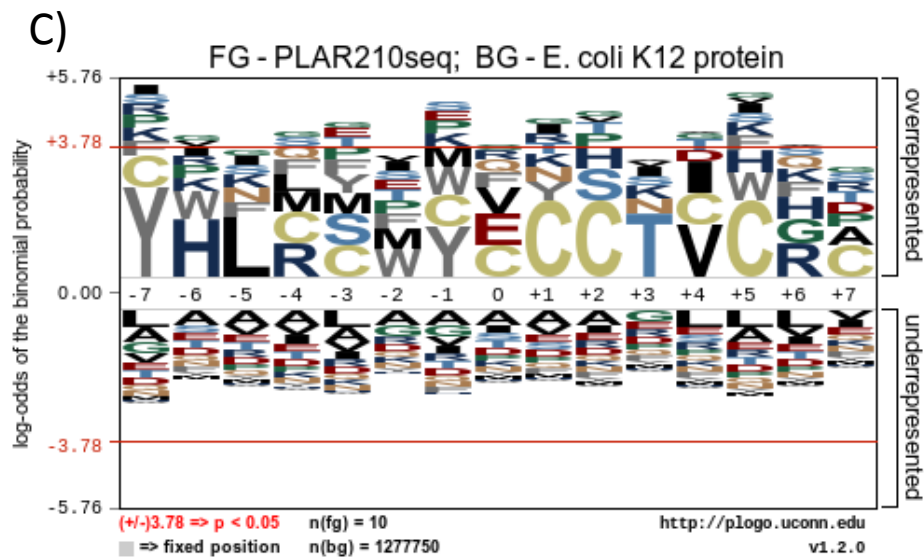

Supplementary Figure S3. Visualization of motifs of unique 15-mer sequences calculated against background probabilities for *E. coli* K12 in Round 2 library (A) all 15-mers (B) 40 most frequently occurring 15-mers and (C) 10 most frequently occurring 15-mers, as generated by the pLogo software (<http://plogo.uconn.edu>) of O'Shea *et al.* [21]

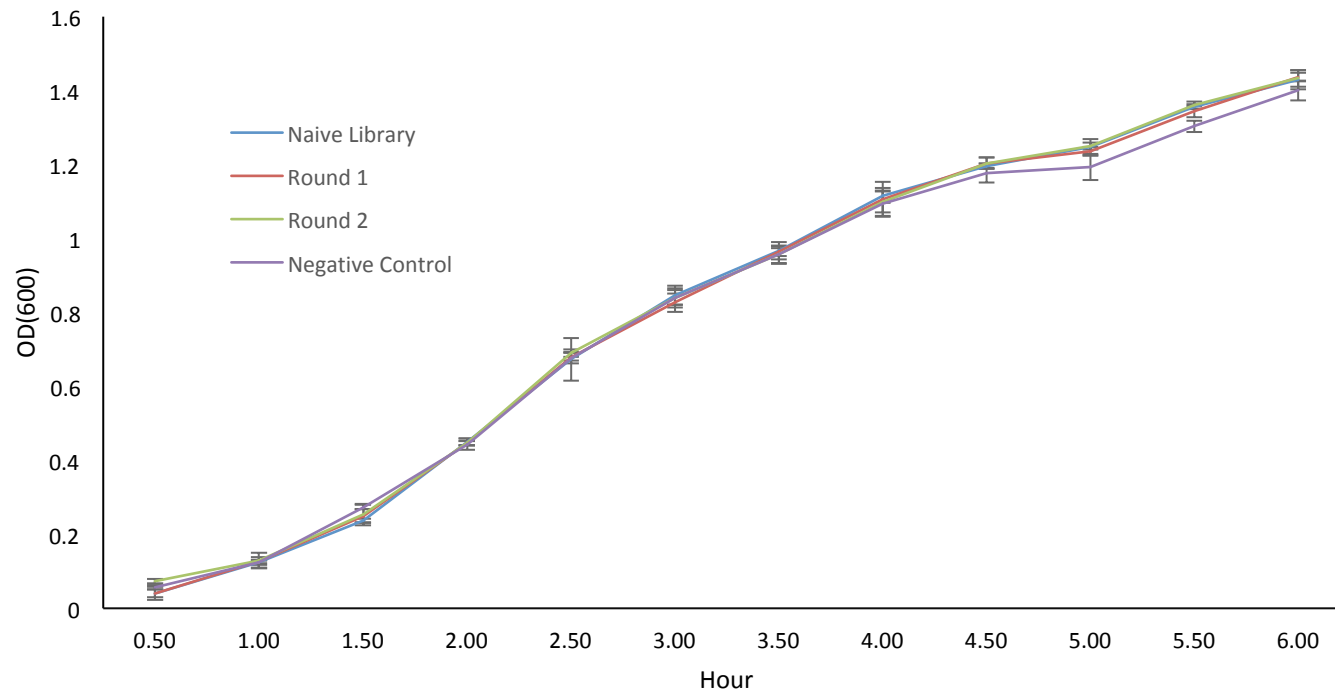

**Supplementary Figure S4. Growth curves over 6 hours for the naive library, both sorting rounds, and the negative control after a 1:100 dilution from overnight cultures in fresh media.**

|                |               | Valid Inserts | Frame Shift | Stop Codon | Empty Scaffold | Total # of Sequences |
|----------------|---------------|---------------|-------------|------------|----------------|----------------------|
| <b>Round 0</b> | <b>Total</b>  | 466,476       | 331,377     | 255,658    | 158,791        | 1,212,302            |
|                | <b>Unique</b> | 396,641       | 313,601     | 224,685    | ---            | ---                  |
| <b>Round 1</b> | <b>Total</b>  | 591,400       | 350,783     | 299,598    | 176,237        | 1,418,018            |
|                | <b>Unique</b> | 67,885        | 208,322     | 42,017     | ---            | ---                  |
| <b>Round 2</b> | <b>Total</b>  | 770,853       | 279,786     | 201,774    | 152,954        | 1,405,367            |
|                | <b>Unique</b> | 21,931        | 133,599     | 7,966      | ---            | ---                  |

**Supplementary Table S1. Raw count of total and unique sequences for all sequence categories of each library.**

|                |                  | <b>0 cysteines</b> | <b>1 cysteine</b> | <b>2 cysteines</b> | <b>3 cysteines</b> | <b>4 cysteines</b> |
|----------------|------------------|--------------------|-------------------|--------------------|--------------------|--------------------|
| <b>Round 0</b> | <b>raw count</b> | 252165             | 116024            | 24846              | 3275               | 309                |
|                | <b>decimal</b>   | 0.635751           | 0.292516          | 0.062641           | 0.008257           | 0.000779           |
| <b>Round 1</b> | <b>raw count</b> | 42299              | 20649             | 4305               | 564                | 65                 |
|                | <b>decimal</b>   | 0.623098           | 0.304176          | 0.063416           | 0.008308           | 0.000958           |
| <b>Round 2</b> | <b>raw count</b> | 12344              | 7809              | 1497               | 263                | 18                 |
|                | <b>decimal</b>   | 0.562856           | 0.356071          | 0.06826            | 0.011992           | 0.000821           |

**Supplementary Table S2. Raw count and decimal of total sequences in library containing 0-4 cysteines, round by round.**
